# Supplementary material
Source: ML conference proceedings conference paper supplement (https://proceedings.neurips.cc/paper_files/paper/2013/hash/45645a27c4f1adc8a7a835976064a86d-Abstract.html)
Supplement: Supplementary file [file 45645a27c4f1adc8a7a835976064a86d-Supplemental.zip]

# Supplementary Materials for “Factorized Asymptotic Bayesian Inference for Latent Feature Models”

## A Lower Bound and Update Equations in M-step

The expectations in lower bound (10) are explicitly written as:

$$\begin{aligned} \mathbb{E}_q[\log p(\mathbf{X}|\mathbf{Z}, \boldsymbol{\Theta})] = & -\frac{1}{2}\text{tr}(\boldsymbol{\Lambda}\mathbf{W}\sum_n \mathbb{E}_q[\mathbf{z}_n\mathbf{z}_n^\top]\mathbf{W}^\top - 2\boldsymbol{\Lambda}\mathbf{W}\sum_n \boldsymbol{\mu}_n\bar{\mathbf{x}}_n^\top + \boldsymbol{\Lambda}\sum_n \bar{\mathbf{x}}_n\bar{\mathbf{x}}_n^\top) \\ & + \frac{N}{2}\sum_d \log \lambda_d, \end{aligned} \quad (15)$$

$$\mathbb{E}_q[\log p(\mathbf{Z}|\boldsymbol{\pi})] = \boldsymbol{\eta}(\boldsymbol{\pi})^\top \sum_n \boldsymbol{\mu}_n - N \sum_k \log(1 + e^{\eta(\pi_k)}). \quad (16)$$

By taking gradients of lower bound (10) with respect to  $\mathcal{P}$ , we obtain the following closed-form solutions:

$$\mathbf{W} = \sum_n \bar{\mathbf{x}}_n \boldsymbol{\mu}_n^\top \left( \sum_n \mathbb{E}_q[\mathbf{z}_n \mathbf{z}_n^\top] \right)^{-1}, \quad (17)$$

$$\frac{1}{\lambda_d} = \frac{\sum_n (\mathbf{w}_d^\top \mathbb{E}_q[\mathbf{z}_n \mathbf{z}_n^\top] \mathbf{w}_d - 2\bar{x}_{nd} \boldsymbol{\mu}_n^\top \mathbf{w}_d + \bar{x}_{nd}^2)}{N}, \quad (18)$$

$$\mathbf{b} = \frac{\sum_n (\mathbf{W} \boldsymbol{\mu}_n - \mathbf{x}_n)}{N}. \quad (19)$$

## B The Algorithm of merge

Algorithm 1 summarizes the procedures of merge, which is used in line 10 of Algorithm 1.

---

### Algorithm 1 merge

---

```

input  $\{\boldsymbol{\mu}_n\}, \mathbf{W}$ 
1: for  $k = 1, \dots, K$  do
2:   Create distance matrix  $\mathbf{D}$  from  $\mathbf{W}$ 
3:    $l \leftarrow \text{argmin}_{k'} D_{kk'}$ 
4:    $\mathbf{w}'_k \leftarrow 2\mathbf{w}_{\cdot k}, \mathbf{w}'_l \leftarrow \mathbf{0}$ 
5:    $\boldsymbol{\mu}'_k \leftarrow (\boldsymbol{\mu}_{\cdot k} + \boldsymbol{\mu}_{\cdot l})/2, \boldsymbol{\mu}'_l \leftarrow \mathbf{0}$ 
6:   if  $\mathcal{L}(\mathbf{W}', \{\boldsymbol{\mu}'_n\}) \geq \mathcal{L}(\mathbf{W}, \{\boldsymbol{\mu}_n\})$  then  $\mathbf{W} \leftarrow \mathbf{W}', \{\boldsymbol{\mu}_n\} \leftarrow \{\boldsymbol{\mu}'_n\}$ 
7: end for

```

---

## C Shrinkage Acceleration and Exponentiated Gradient

The optimization procedure of shrinkage acceleration discussed in Section 3 has another interpretation as the exponentiated gradient descent [1], which is a gradient-based optimization technique on a simplex. The exponentiated gradient algorithm maximizes Eq. (13) by iteratively solving the following updates:

$$q^t(\mathbf{Z}) = \underset{q}{\text{argmax}} \mathcal{L}(q) + \alpha \sum_{\mathbf{Z}} q(\mathbf{Z}) \log \frac{q(\mathbf{Z})}{q^{t-1}(\mathbf{Z})}, \quad (20)$$

where the second term is a proximal one of the KL-divergence from the previous solution. By taking the derivative to zero, the solution is given as

$$q^t(\mathbf{Z}) \propto (q^{t-1})^{1-\frac{1}{\alpha}} \exp(\alpha \nabla \mathcal{L}(q^{t-1})). \quad (21)$$

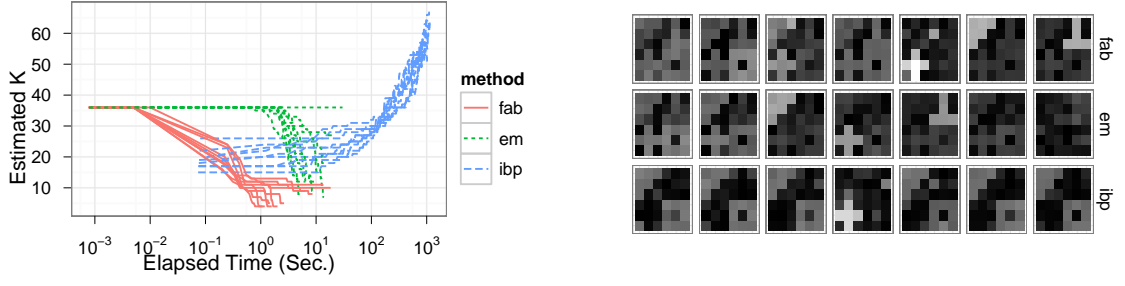

(a)  $N = 500$ .

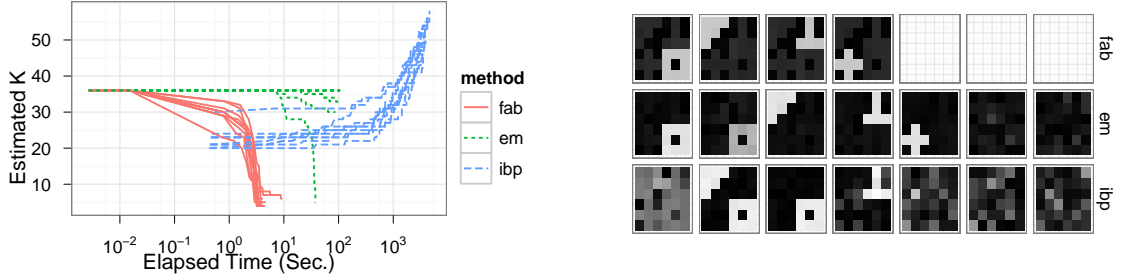

(b)  $N = 2000$ .

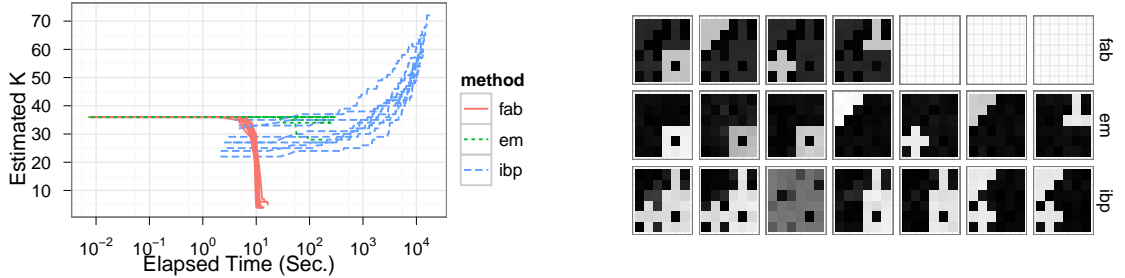

(c)  $N = 5000$ .

Figure 1: Estimated  $K$  v.s. elapsed time over 10 trials (left) and learned  $\mathbf{W}$  (right) in `block` data.

In contrast with the CCCP, the exponentiated gradient has a tunable step size  $\alpha > 0$ . If we set a small  $0 < \alpha < 1$ , the solution moves faster. We can easily confirm that solution (21) is equivalent to that of the CCCP (14) with  $\alpha = 1$ . This property may reduce computational cost in our acceleration scheme; currently `accelerateShrinkage()` requires hundred iterations to obtain a sparse solution of  $\{\mu_n\}$ , but that procedure is potentially replaced by a few iteration with small  $\alpha$ .

## D Additional Block Data Experiments

Figure 1 depicts the relationship between estimated  $K$  and elapsed time (left panel) and examples of estimated  $\mathbf{W}$  (right panel) in which TLL is the median over 10 trials. We observe that, the larger the number of samples  $N$ , the more accurate the model selection of *FAB*. This is reasonable because of FIC's asymptotic property. Indeed, for  $N = 5000$ , *FAB* correctly selected  $K$  at 8 trials out of 10.

## E Proofs

First, let us summarize the assumptions we will use for the following proofs: **A1**) the prior of  $\mathcal{P}$  can be factorized as:  $p(\mathcal{P}|\mathcal{M}) = p(\pi|\mathcal{M}) \prod_d p(\theta_d|\mathcal{M})$ , **A2**) those priors are continuous, and **A3**) the log-priors are constant with respect to  $N$ , i.e.,  $\lim_{N \rightarrow \infty} \frac{\log p(\theta_d|\mathcal{M})}{N} = 0$ . Further, when we consider the asymptotic behaviour, let us assume  $\mathbf{z}_n$  for  $n = 1, \dots, N$  to be independent random variables such that: **A4**) for sufficiently large  $N$ ,  $\sum_n z_{nk}/N$  converges in probability to  $p_k$  such that  $0 < p_k < 1$ .

Before giving the proof of Lemma 1, let us introduce the following definition and lemmas.

**Definition 5.** The exponential family representation of the Gaussian likelihood  $p(x_n|\mathbf{z}_n, \boldsymbol{\theta})$  has the natural parameter  $\boldsymbol{\xi}_n = (\lambda(\mathbf{w}^T \mathbf{z}_n + b), -\lambda/2)$  and the log-partition function  $\psi(\boldsymbol{\xi}) = -\frac{\xi_1^2}{4\xi_2} - \frac{1}{2} \log 2\xi_2$ . The negated Hessian matrix of the log-likelihood with respect to  $\boldsymbol{\theta}$  is then given as

$$-\frac{\partial^2}{\partial \boldsymbol{\theta} \partial \boldsymbol{\theta}^T} \log p(x_n|\mathbf{z}_n, \boldsymbol{\theta}) = \frac{\partial \boldsymbol{\xi}_n}{\partial \boldsymbol{\theta}} \boldsymbol{\Psi}^{(n)} \frac{\partial \boldsymbol{\xi}_n^T}{\partial \boldsymbol{\theta}}, \quad (22)$$

where  $\boldsymbol{\Psi}^{(n)}$  is the Hessian matrix of  $\psi(\cdot)$  in which the elements are given by  $\Psi_{11}^{(n)} = \frac{-1}{2\xi_2}$ ,  $\Psi_{12}^{(n)} = \Psi_{21}^{(n)} = \frac{\xi_1}{2\xi_2^2}$ , and  $\Psi_{22}^{(n)} = \frac{\xi_2 - 2\xi_1^2}{4\xi_2^3}$  (for the sake of clarity, we omitted  $n$  from  $\xi_{n2}$  because it does not depend on  $n$ .)

**Lemma 6.** For a symmetric, block matrix  $\mathbf{M} = \begin{pmatrix} \mathbf{A} & \mathbf{B} \\ \mathbf{B}^T & \mathbf{C} \end{pmatrix}$  is positive definite (PD) if and only if (i)  $\mathbf{C}$  and its Schur complement  $\mathbf{A} - \mathbf{B}\mathbf{C}^{-1}\mathbf{B}^T$  are both PD and (ii)  $\mathbf{A}$  and its Schur complement  $\mathbf{C} - \mathbf{B}^T\mathbf{A}^{-1}\mathbf{B}$  are both PD.

**Lemma 7.** Under **A4**,  $\mathbf{F}^{(d)}$  in Eq. (6) converges in probability to a PD matrix for  $N \rightarrow \infty$ .

*Proof of Lemma 7.* In this proof, we omit the index  $d$  for the sake of clarity. First, according to Eq. (22),  $\mathbf{F}$  is rewritten as  $\mathbf{F} = \frac{1}{N} \begin{pmatrix} \mathbf{S} & \mathbf{u} \\ \mathbf{u}^T & v \end{pmatrix}$  where

$$\mathbf{S} = \lambda^2 \Psi_{11}^{(n)} \begin{pmatrix} \sum_n \mathbf{z}_n \mathbf{z}_n^T & \sum_n \mathbf{z}_n \\ \sum_n \mathbf{z}_n & 1 \end{pmatrix} / N,$$

$\mathbf{u} = \lambda \Psi_{11}^{(n)} (\sum_n (\mathbf{w}^T \mathbf{z}_n + b) \mathbf{z}_n / N, \sum_n (\mathbf{w}^T \mathbf{z}_n + b) / N)$ , and  $v = \Psi_{11}^{(n)} \sum_n \{(\mathbf{w}^T \mathbf{z}_n + b)^2 - \frac{\Psi_{12}^2 + \Psi_{11} \Psi_{22}}{4\Psi_{11}^2}\} / N$ . By introducing the diagonal matrix

$$\mathbf{D} \equiv \begin{pmatrix} \text{diag}(\sum_n \mathbf{z}_n / N) & \mathbf{0} \\ \mathbf{0} & 1 \end{pmatrix}, \quad (23)$$

we are able to rescale  $\mathbf{F}$  as  $\mathbf{F} = \mathbf{D}^{1/2} \tilde{\mathbf{F}} \mathbf{D}^{1/2}$ . Note that  $\mathbf{D}$  is PD because of **A4**, and  $\mathbf{F}$  is PD if and only if  $\tilde{\mathbf{F}}$  is PD because the product of PD matrices is PD. Thus now we only need to say  $\tilde{\mathbf{F}}$  is PD.

Next, let us consider the asymptotic behavior of  $\tilde{\mathbf{F}}$ . According to **A4**,  $\tilde{\mathbf{S}}$  converges in probability as:

$$\tilde{\mathbf{S}} \rightarrow \lambda^2 \Psi_{11}^{(n)} \begin{pmatrix} \sqrt{\mathbf{p}} \sqrt{\mathbf{p}}^T + \text{diag}(\mathbf{1} - \mathbf{p}) & \sqrt{\mathbf{p}} \\ \sqrt{\mathbf{p}}^T & 1 \end{pmatrix}. \quad (24)$$

Since the Schur complement  $\lambda(\sqrt{\mathbf{p}} \sqrt{\mathbf{p}}^T + \text{diag}(\mathbf{1} - \mathbf{p})) - \lambda \sqrt{\mathbf{p}} \sqrt{\mathbf{p}}^T = \lambda \text{diag}(\mathbf{1} - \mathbf{p})$  is PD by **A4**, Lemma 6 results that  $\tilde{\mathbf{S}}$  converges to a PD matrix. Similarly,  $\tilde{\mathbf{u}} \rightarrow \lambda \Psi_{11}^{(n)} \{(\mathbf{w}^T \mathbf{p} + b) \sqrt{\mathbf{p}} + \mathbf{w} * (\mathbf{1} - \mathbf{p}) * \sqrt{\mathbf{p}}\}$  where  $*$  denotes Hadamard product and  $v$  converges to a positive number, and using Lemma 6 again yields the statement.  $\square$

*Proof of Lemma 1.* By using the diagonal matrix  $\mathbf{D}$  defined in Eq. (23), we have

$$\begin{aligned} \log \det |\mathbf{F}^{(d)}| &= \log \det |\mathbf{D}^{1/2} \tilde{\mathbf{F}}^{(d)} \mathbf{D}^{1/2}| \\ &= \log \det |\tilde{\mathbf{F}}^{(d)}| + \sum_k \log \frac{\sum_n z_{nk}}{N}. \end{aligned}$$

From the proof of Lemma 7, since determinants of  $\tilde{\mathbf{S}}$  and Schur complements converge to  $O_p(1)$  and  $\log \det |\tilde{\mathbf{F}}^{(d)}|$  is the product of them,  $\log \det |\tilde{\mathbf{F}}^{(d)}|$  is  $O_p(1)$ .  $\square$

*Proof of Theorem 2.* **A1**, **A2**, and Lemma 7 enable us to apply Laplace's method [2] separately for each data dimension:

$$\begin{aligned} \log p(\mathbf{X}, \mathbf{Z}|\mathcal{M}) &= \sum_d \log \iint p(\mathbf{x}_{\cdot d}, \mathbf{Z}|\boldsymbol{\theta}_d) p(\boldsymbol{\theta}_d|\mathcal{M}) d\boldsymbol{\pi} d\boldsymbol{\theta}_d \\ &\approx \frac{|\mathcal{P}|}{2} \log \frac{2\pi}{N} + \log p(\mathbf{X}, \mathbf{Z}|\hat{\mathcal{P}}) + \log p(\hat{\mathcal{P}}|\mathcal{M}) \\ &\quad - \frac{1}{2} \sum_k \log \left. \frac{\partial^2 - \log p(\mathbf{z}_{\cdot k}|\pi_k)}{\partial \pi_k^2} \right|_{\hat{\pi}_k} - \frac{1}{2} \sum_d \log \det |\mathbf{F}^{(d)}|. \end{aligned}$$

By substituting the result from Lemma 1 and ignoring asymptotically constant terms, we obtain the statement.  $\square$

*Proof of Theorem 4.* Here we assume  $\mathbf{w}_{\cdot k}^* = \mathbf{w}_{\cdot l}^*$ . From Eq. (17), the relationship  $\mathbf{W}^* \sum_n \mathbb{E}_{q^*}[\mathbf{z}_n \mathbf{z}_n^\top] = \sum_n \mathbf{x}_n (\boldsymbol{\mu}_n^*)^\top$  holds. By substituting the equality into  $\mathcal{L}$  and taking a derivative with respect to  $\mu_{nk}$ , we obtain  $\mu_{nk}^* = g(\beta_{nk} + \eta(\pi_k^*) - \frac{D}{2N\pi_k^*})$ , where  $\beta_{nk} = \frac{1}{2} \mathbf{x}_n^\top \boldsymbol{\Lambda}^* \mathbf{w}_{\cdot k}^*$  and  $\pi_k^* = \sum_n \mu_{nk}^*/N$ . By taking a summation over  $n$  and dividing by  $\pi_k^*$  on both sides, we have

$$\begin{aligned} N &= \frac{1}{\pi_k^*} \sum_n g(\beta_{nk} + \eta(\pi_k^*) - \frac{D}{2N\pi_k^*}) \\ &= \sum_n \left( \pi_k^* + (1 - \pi_k^*) \exp(-\beta_{nk} + \frac{D}{2N\pi_k^*}) \right)^{-1} \\ &= \sum_n \frac{\exp(\beta_{nk})}{\pi_k^* \exp(\beta_{nk}) + \gamma_k}, \end{aligned}$$

where  $\gamma_k = (1 - \pi_k^*) \exp(\frac{D}{2N\pi_k^*})$ . We have a similar result for  $\mu_{nl}^*$  that  $N = \sum_n \frac{\exp(\beta_{nk})}{\pi_l^* \exp(\beta_{nk}) + \gamma_l}$  (Note that the assumption  $\mathbf{w}_{\cdot k}^* = \mathbf{w}_{\cdot l}^*$  implies  $\beta_{nk} = \beta_{nl}$ .) By taking the difference between that of  $\mu_{nk}^*$  and  $\mu_{nl}^*$ , we have

$$\sum_n \frac{(\pi_k^* - \pi_l^*) + \gamma_k - \gamma_l}{\exp(-\beta_{nk})(\pi_k^* \exp(\beta_{nk}) + \gamma_k)(\pi_l^* \exp(\beta_{nk}) + \gamma_l)} = 0.$$

From the conditions for the stationary points, the denominator takes a bounded positive value and the equality holds if and only if the numerator takes zero, i.e.,

$$\begin{aligned} &\pi_k^* + (1 - \pi_k^*) \exp(\frac{D}{2N\pi_k^*}) - \{\pi_l^* + (1 - \pi_l^*) \exp(\frac{D}{2N\pi_l^*})\} \\ &= (1 - \pi_k^*)(\exp(\frac{D}{2N\pi_k^*}) - 1) - (1 - \pi_l^*) \exp(\frac{D}{2N\pi_l^*} - 1) = 0. \end{aligned}$$

Since the function  $(1 - \pi)(\exp(\frac{D}{2N\pi}) - 1)$  increases strictly monotonically for  $\pi \in (0, 1]$ , the equality holds if and only if  $\pi_k^* = \pi_l^*$ .  $\square$

## References

- [1] J. Kivinen and M. K. Warmuth. Exponentiated gradient versus gradient descent for linear predictors. *Information and Computation*, 132(1):1–63, Jan. 1997.
- [2] R. Wong. *Asymptotic Approximation of Integrals (Classics in Applied Mathematics)*. SIAM: Society for Industrial and Applied Mathematics, Aug. 2001.
